# Supplementary material for: MSAViewer: interactive JavaScript visualization of multiple sequence alignments
Source: PubMed Central journal article supplement — Bioinformatics. 2016 Jul 13;32(22):3501–3. doi: 10.1093/bioinformatics/btw474 (PMC5181560; doi:10.1093/bioinformatics/btw474), 2016-07-13
Supplement: supp_btw474_msa_response_som.pdf [file supp_btw474_msa_response_som.pdf]

**Supporting online material  
for:  
MSAViewer: interactive JavaScript visualization of  
multiple sequence alignments**

**Guy Yachdav, Sebastian Wilzbach, Benedikt Rauscher, Robert  
Sheridan, Ian Sillitoe, James Procter, Suzanna Lewis,  
Burkhard Rost & Tatyana Goldberg**

**Material**

**Table SOM\_1: Comparison of MSAViewer features with popular alignment analysis tools.**

| <b>Features</b>               | <b>MSAViewer<sup>1</sup></b>      | <b>Jalview Desktop<sup>2</sup></b>                                          | <b>Jalview Lite<sup>3</sup></b>                                             | <b>JSAV<sup>4</sup></b>     | <b>alignmentviewer.org<sup>5</sup></b> | <b>ProViz<sup>6</sup></b>                                               | <b>Wasabi<sup>7</sup></b>                                          |
|-------------------------------|-----------------------------------|-----------------------------------------------------------------------------|-----------------------------------------------------------------------------|-----------------------------|----------------------------------------|-------------------------------------------------------------------------|--------------------------------------------------------------------|
| <b>GENERAL INFORMATION</b>    |                                   |                                                                             |                                                                             |                             |                                        |                                                                         |                                                                    |
| Programing language           | JavaScript                        | Java                                                                        | Java                                                                        | JavaScript                  | Java                                   | JavaScript                                                              | JavaScript (frontend), Python (backend)                            |
| Web compatible                | yes                               | no                                                                          | yes                                                                         | yes                         | yes                                    | yes                                                                     | yes                                                                |
| Extendable API by a developer | yes                               | no                                                                          | no                                                                          | yes                         | no                                     | no                                                                      | yes                                                                |
| <b>DATA IMPORT</b>            |                                   |                                                                             |                                                                             |                             |                                        |                                                                         |                                                                    |
| Data source                   | File, URL, drag & drop            | File, URL, textbox                                                          | Textbox                                                                     | Array of JavaScript objects | File, drag & drop                      | File, URL, drag & drop, textbox                                         | File,URL, drag & drop                                              |
| Alignment formats             | FASTA, Clustal                    | FASTA, Clustal, MSF, PFAM,PIR, BLC, AMSA, JalView, Stockholm, RNAML, PHYLIP | FASTA, Clustal, MSF, PFAM,PIR, BLC, AMSA, JalView, Stockholm, RNAML, PHYLIP | n.a.                        | FASTA, Stockholm, plain text           | FASTA, UniProt term triggers a visualization of a precomputed alignment | FASTA, Clustal, Phylip, NEXUS, HSAML and through Ensembl REST API  |
| Sequence annotation formats   | GFFv3 (non-hierarchical), JalView | JalView, GFFv1                                                              | JalView, GFFv1                                                              | n.a.                        | Tab separated text file                | Automatic retrieval of annotations from various resources               | n.a.                                                               |
| Phylogenetic tree format      | Newick                            | Newick                                                                      | Newick                                                                      | n.a.                        | n.a.                                   | n.a.                                                                    | Newick, extended Newick, NEXUS, HSAML and through Ensembl REST API |
| <b>DATA EXPORT</b>            |                                   |                                                                             |                                                                             |                             |                                        |                                                                         |                                                                    |
| Alignment formats             | FASTA                             | FASTA, MSF, CLUSTAL, BLC, PIR, PFAM, JalView, AMSA, STH, Phylip             | FASTA, MSF, CLUSTAL, BLC, PIR, PFAM, JalView, AMSA, STH, Phylip             | FASTA                       | n.a.                                   | FASTA                                                                   | FASTA, Phylip, NEXUS                                               |
| Sequence annotation formats   | GFF                               | GFF, JalView                                                                | JalView                                                                     | n.a.                        | n.a.                                   | n.a.                                                                    | n.a.                                                               |

|                                        |                                                                                     |                                                                                                                                    |                                                                                                                                    |                                                                    |                                 |                                                                        |                                                                      |  |
|----------------------------------------|-------------------------------------------------------------------------------------|------------------------------------------------------------------------------------------------------------------------------------|------------------------------------------------------------------------------------------------------------------------------------|--------------------------------------------------------------------|---------------------------------|------------------------------------------------------------------------|----------------------------------------------------------------------|--|
| Image                                  | PNG                                                                                 | HTML, EPS, PNG, SVG                                                                                                                | n.a.                                                                                                                               | n.a.                                                               | n.a.                            | PDF                                                                    | n.a.                                                                 |  |
| URL for submission to another web site | yes                                                                                 | Includes web services for bioinformatic data analysis                                                                              | n.a.                                                                                                                               | yes                                                                | no                              | yes                                                                    | yes                                                                  |  |
| CONSENSUS SEQUENCE                     |                                                                                     |                                                                                                                                    |                                                                                                                                    |                                                                    |                                 |                                                                        |                                                                      |  |
| Mode of calculation                    | Most frequent residue per column                                                    | Most frequent residue per column                                                                                                   | Most frequent residue per column                                                                                                   | Input sequence most similar to other sequences (centroid sequence) | First sequence of the alignment | First sequence of the alignment                                        | n.a.                                                                 |  |
| NAVIGATION THROUGH THE ALIGNMENT       |                                                                                     |                                                                                                                                    |                                                                                                                                    |                                                                    |                                 |                                                                        |                                                                      |  |
| Overview panel                         | yes                                                                                 | yes                                                                                                                                | yes                                                                                                                                | no                                                                 | yes                             | yes                                                                    | no                                                                   |  |
| Mode of navigation                     | Scrolling, "jump to a column", panning                                              | Scrolling, keyboard shortcuts, "Jump to sequence position"                                                                         | Scrolling, keyboard shortcuts, "Jump to sequence position"                                                                         | Scrolling                                                          | Scrolling                       | Scrolling, keyboard shortcut on a feature, specified range of residues | Scrolling                                                            |  |
| Motif search (regular expression)      | yes                                                                                 | yes                                                                                                                                | yes                                                                                                                                | no                                                                 | no                              | yes                                                                    | no                                                                   |  |
| Sequence sorting by ...                | Sequence identifiers, sequence names, sequences, % of gaps, % identity to consensus | Sequence names, length, group, pairwise identity, sequence features (scores, counts), associated tree, alignment annotation scores | Sequence names, length, group, pairwise identity, sequence features (scores, counts), associated tree, alignment annotation scores | Sequences and regions of sequences                                 | % identity to consensus.        | Manual reordering, restriction to model organisms                      | Reordering through rearranging or pruning phylogenetic tree branches |  |
| COLOURING/ HIGHLIGHTING/ HIDING        |                                                                                     |                                                                                                                                    |                                                                                                                                    |                                                                    |                                 |                                                                        |                                                                      |  |
| Flexible coloring schemas              | yes                                                                                 | yes                                                                                                                                | yes                                                                                                                                | yes                                                                | no                              | no                                                                     | yes                                                                  |  |
| Hide columns by ...                    | Selection, % identity to consensus, % gaps                                          | Selection and/or annotation                                                                                                        | Selection and/or annotation                                                                                                        | n.a.                                                               | n.a.                            | Gaps in the query sequence                                             | % gaps                                                               |  |
| Hide sequences by ...                  | Selection, % identity to consensus, % gaps                                          | Selection                                                                                                                          | Selection                                                                                                                          | Selection                                                          | % identity to consensus, % gaps | Selection                                                              | Selection                                                            |  |

| ADDITIONAL VISUALIZATION ELEMENTS                            |                    |          |               |      |           |           |                            |
|--------------------------------------------------------------|--------------------|----------|---------------|------|-----------|-----------|----------------------------|
| Sequence logo                                                | yes                | no       | no            | no   | yes       | no        | no                         |
| Nucleotides/ amino acids conservation scores                 | yes                | yes      | yes           | no   | no        | yes       | no                         |
| Occupancy per column (gap weights)                           | yes                | no       | no            | no   | no        | no        | no                         |
| Phylogenetic tree                                            | yes                | yes      | yes           | no   | no        | no        | yes                        |
| ADDITIONAL FEATURES                                          |                    |          |               |      |           |           |                            |
| Recognition of identifiers for linking to external databases | UniProtKB, GenBank | EMBL-EBI | EMBL-EBI, PDB | n.a. | UniProtKB | UniProtKB | Ensembl GeneID, GeneTreeID |

<sup>1</sup> MSAViewer is our JavaScript-based tool described in the main text.

<sup>2</sup> Jalview Desktop (Waterhouse, et al., 2009) is an example of a powerful and a highly used desktop application.

<sup>3</sup> Jalview Lite (Waterhouse, et al., 2009) is an example of a lightweight Java applet for use in web applications.

<sup>4</sup> JSAV (Martin, 2014) is an example of a recently developed JavaScript-based tool.

<sup>5</sup> <http://www.alignmentviewer.org/> is an example a of server side-rendered graphics.

<sup>6-7</sup> ProViz (Jehl, et al., 2016) and Wasabi (Veidenberg, et al., 2016) are examples of backend server-based tools.

## Section SOM\_1: MSAViewer implementation

The MSAViewer is a JavaScript application that renders an MSA as a Canvas element. Canvas is a web technology adopted by modern web browsers that renders graphical presentation without relying on browser plugins. Whereas other drawing technologies, like Scalable Vector Graphics (SVG), strain the browser memory by maintaining an object model for each rendered graphical element, Canvas objects are drawn on the fly, and are thus a more efficient approach for visualizing large data sets. By using the Canvas to render only the visible part of the alignment, fewer resources are needed. Basic support for Canvas is now available in all major browsers (<http://caniuse.com/#search=canva>). To support the integration of the tool with other web applications, the viewer was designed with modularity in mind allowing the separation of user controls from the MSA presentation. Programmatic access to the functionalities of each module further enables integration. These implementation decisions improved the performance of the MSA viewer as compared to existing JavaScript multiple sequence alignment viewers. A performance survey of existing JavaScript-based MSA viewers is given in Supplementary Table\_SOM2.

**Table SOM\_2: Performance profiling of MSAViewer against JSAV.**

| PFAM family            | PF15698 (150 proteins) <sup>8</sup> |         | PF01437 (3239 proteins) <sup>9</sup> |          | PF00982 (9717 proteins) <sup>10</sup> |      |
|------------------------|-------------------------------------|---------|--------------------------------------|----------|---------------------------------------|------|
| Method<br>Task         | MSAViewer                           | JSAV    | MSAViewer                            | JSAV     | MSAViewer                             | JSAV |
| Loading <sup>1</sup>   | 1.22                                | 50.55   | 1.09                                 | 1796.67  | 1.07                                  | N/A  |
| Scripting <sup>2</sup> | 312.66                              | 266.04  | 86.27                                | 1153.33  | 361.93                                | N/A  |
| Rendering <sup>3</sup> | 22.50                               | 484.65  | 1.40                                 | 19733.33 | 1.18                                  | N/A  |
| Painting <sup>4</sup>  | 10.86                               | 174.97  | 5.98                                 | 366.56   | 4.22                                  | N/A  |
| Other <sup>5</sup>     | 40.60                               | 141.09  | 52.72                                | 828.09   | 340.93                                | N/A  |
| Idle <sup>6</sup>      | 2773.33                             | 2803.33 | 3030.00                              | 3013.33  | 3083.33                               | N/A  |
| Total <sup>7</sup>     | 3161.17                             | 3920.64 | 3177.47                              | 26891.32 | 3792.66                               | N/A  |

MSAViewer and JSAV (Martin, 2014) are JavaScript-based applications. While MSAViewer uses Canvas, JSAV uses DOM objects to render and draw the alignment. To eliminate the effect of network speed and data file transfer times, we downloaded all source files and data files, and used them from the same disk drive. Performance timings showed in the table are in milliseconds and were collected from the event categories in the “Timeline” tab of the Google Developer Tools kit. These event categories include:

<sup>1</sup>*Loading*: parse HTML, finish loading, receive data, receive response and send request.

<sup>2</sup>*Scripting*: animation, garbage collection, script evaluation, function call and event handling.

<sup>3</sup>*Rendering*: layout, recalculate style, scroll and invalidate layout (triggered by an event that modified the document’s layout).

<sup>4</sup>*Painting*: paint, composite layers and image handling.

<sup>5</sup>*Other*: events not included in the above categories.

<sup>6</sup>*Idle*: time spent on doing nothing.

<sup>7</sup>*Total*: total aggregate time. Note that due to events taking place in parallel, the actual time to complete a presentation is usually shorter than total aggregate time.

**Data:** We report the timing profiles (averages of 3 runs per test case) for MSAViewer and JSAV using the following alignments extracted from the PFAM database (Finn, et al., 2014), release October 2015:

<sup>8</sup>*PF15698* : Phosphatase:150 sequences (1% of PFAM families are of this size)

<sup>9</sup>*PF01437*: Plexin repeat: 3239 sequences (40% of PFAM families are of this size)

<sup>10</sup>*PF00982*: Glycosyltransferase family 20: 9717 sequences (60% of PFAM families are of this size)

Note: for the alignment PF00982 (9717 sequences) we could not produce timing profiles for JSAV and concluded that the viewer has exceeded the amount of memory allowed by the browser.

The performance profile was conducted on a system with the following hardware/software specifications:

Model: Apple MacBook Pro 13-inch, Mid 2012  
OS: OS X 10.9.5 (13F34)  
CPU: 2.5 GHz Intel Core i5  
RAM 2X4GB DDR 1600Mhz  
Disk APPLE HDD HTS545050A7E362 (5400 RPM)  
Software: Google Chrome Version 46.0.2490.80 (64-bit)

## References for Supporting online material

- Finn, R.D., *et al.* (2014) Pfam: the protein families database, *Nucleic acids research*, **42**, D222-230.
- Jehl, P., *et al.* (2016) ProViz-a web-based visualization tool to investigate the functional and evolutionary features of protein sequences, *Nucleic acids research*.
- Martin, A.C. (2014) Viewing multiple sequence alignments with the JavaScript Sequence Alignment Viewer (JSAV), *F1000Research*, **3**, 249.
- Veidenberg, A., Medlar, A. and Loytynoja, A. (2016) Wasabi: An Integrated Platform for Evolutionary Sequence Analysis and Data Visualization, *Molecular biology and evolution*, **33**, 1126-1130.
- Waterhouse, A.M., *et al.* (2009) Jalview Version 2--a multiple sequence alignment editor and analysis workbench, *Bioinformatics*, **25**, 1189-1191.
